# Supplementary material
Source: PubMed Central journal article supplement (PMC7105147)
Supplement: Supplementary_Material_BIO-18-1543.pdf [file Supplementary_Material_BIO-18-1543.pdf]

Supplementary Figures

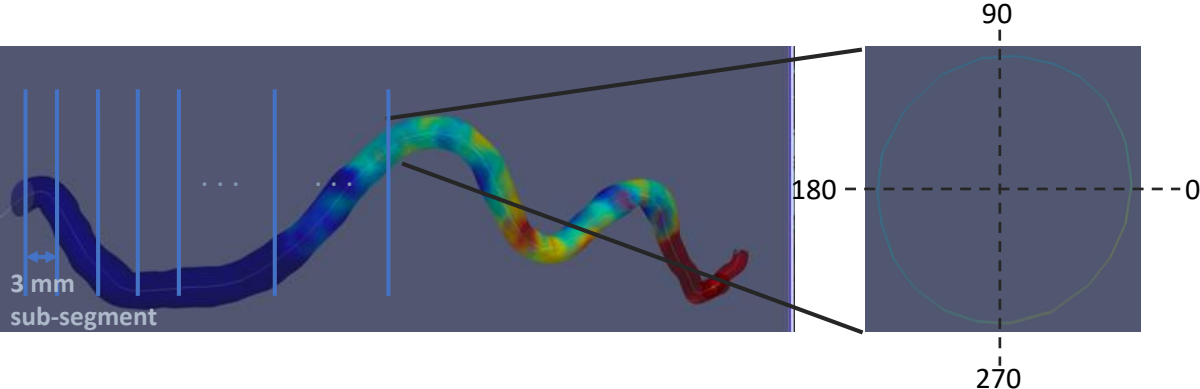

Sub-segment analysis

Sub-arc analysis

Figure S1. Schematic of sub-segment and sub-arc analysis along the centerline of the vessel
